# Supplementary material for: Multi-omics analysis reveals inhibition of osteosarcoma progression by sporoderm-removed Ganoderma lucidum spores via targeting glycerophospholipid and fatty acid Metabolism
Source: Research Square preprint supplement (doi:10.21203/rs.3.rs-6046286/v1), 2025-04-30
Supplement: Supplementary file 1 [file a0d659151c69cb20ce12f613.docx]

**Supplementary Information**

**Materials and methods**

**Materials.** CD3, CD4, and CD8 fluorescent antibodies were purchased from Biogems (Rocky hill, New Jersey, USA).

**Xenograft mouse model.**The research was conducted in accordance with the internationally accepted principles for laboratory animal use and care as found in the NIH guidelines. All animal experiments were approved by the Animal Ethics Committee of Zhejiang Research Institute of Traditional Chinese Medicine (Approved Number: 20190003). The specific pathogen-free (SPF) male BALB/c nude mice (18~20 g), provided by the Hangzhou Medical College, were raised in the Zhejiang Research Institute of Traditional Chinese Medicine.

The mice were randomly divided by weight into two groups: model group (distilled water, *n* = 12), RGLS group (0.7 g/kg, *n* = 12, the dosage, based on clinical use, was weekly adjusted to match the mice's weight changes). S-180 cells (4×106 cells in 200 μL PBS) were subcutaneously transplanted into mice, and the RGLS group was treated with RGLS (0.7 g/kg) by gavage per day. Mice in the model group were given equal volumes of distilled water, and all mice were euthanized seven days later by asphyxiation using CO2.

**Thymus tissue histological examination.**The harvested thymus tissues were fixed in 4% paraformaldehyde, embedded in paraffin, and cut into 5-μm sections. Then, the sections were stained with H&E according to the manufacturer’s protocol. The morphological changes in thymus tissues were observed, and images were randomly captured by a microscope (DM4000, Leica Biosystems).

**Messurement of intralysosomal acidity.** The Lyso-Tracker red reagent (Beyotime, Shanghai, China) exhibits an acid-dependent increase in fluorescence intensity. Cell staining was performed according to the manufacturer's instructions. Briefly, S-180 cells were seeded into 6-well plates at a density of 2×105 cells per well. Cells were then treated with RGLS (2 mg/mL) for 24 h. After incubation, the supernatant was removed, and added a final concentration of 1 μg/mL DAPI and Lyso-Tracker red mixed dyes, and incubated for an additional 1 h at RT in the dark. The fluorescence intensity was observed, and images were randomly captured by a microscope (DM4000, Leica Biosystems).

**Transmission electron microscope.**S-180 cells were seeded into 6-well plates at a density of 2×105 cells per well until cells reach 50% confluence. Cells were then treated with RGLS (2 mg/mL) for 24 h. The cells were washed with PBS and harvested by trypsinization, and then the cells were fixed with 2.5% glutaraldehyde for overnight at 4 ℃. Subsequently, the sample was prepared with reference to the methods described in previous reports. The samples were observed with a Hitachi H-7650 transmission electron microscope (Hitachi, Tokyo, Japan). All images were acquired by a Gatan SC1000 (Model 832) CCD camera (Gatan Inc, Pleasanton, CA, USA).

**Flow cytometric analysis of T cell subtypes and proportions.** The 100 μL of EDTA-K2-treated anti-coagulant peripheral blood was collected, and 2 μL of CD3, CD4, and CD8 fluorescent antibodies were added successively, and incubated at RT for 20 min in the dark. Then add 1 mL erythrocyte lysate and incubate at RT for 15 min in the dark, centrifuge (500 g, 5 min) and discard the supernatant. Next, add 1 mL sterile PBS to wash precipitation, centrifuge (500 g, 5 min), and discard supernatant. Finally, 500 μl sterile PBS was added to resuspend precipitation, and the proportion of CD3+, CD3+CD4+ and CD3+CD8+ T cells was measured using flow cytometry.

**Statistical analysis.** All data are presented as the mean ± standard error (SE) of at least three independent experiments. For comparisons between the two conditions, a student *t*-test was used. And for multiple comparisons, one-way analysis of variance (ANOVA) with Tukey's test was used. All analyzed were performed using Graphpad Prism 8.0 software (Graphpad Software, Inc., USA), and a value of *P*﹤0.05 was a considered to be statistically significant difference.

**Supplementary figure legends**

**Figure S1.** Effect of RGLS on growth of S-180 xenograft tumor *in vivo*. (A) Experimental protocol. (B-C) Effect of RGLS on tumor size (B) and weight (C). (D) Effect of RGLS on body weight of mice. ***P*˂0.01 compared with Model group, *n* = 6.

**Figure S2.** RGLS alleviates tumor-induced immune deficiency. (A) Effect of RGLS on pathological changes of thymic tissue (200×, Scale bar = 100 μm; 100×, Scale bar = 200 μm). (B-C) Effect of RGLS on the proportion of CD3+, CD4+ and CD8+ T cells in peripheral blood. ***P*˂0.01 compared with Con group, ###*P*˂0.001 compared with Model group, *n* = 6.

**Figure S3.** RGLS regulates lysosomal related biological processes. (A) Effect of RGLS on the expression of apoptosis-related protein in tumor tissue. (B) Effect of RGLS on the number of autophagosomes in S-180 cells. (C) Effect of RGLS on the expression of LC3B and p62 in S-180 cells. (D) Effect of RGLS on lysosomal acidity in S-180 cells (400×, Scale bar = 50 μm). (E) Effect of RGLS on the expression of Lamp1 and Lamp2 in tumor tissue. (F) Effect of RGLS on the expression of lysosomal cathepsin in tumor tissue. (G) Ct for qRT-PCR in S-180 cells. (H) Effect of RGLS on proliferation of Raw264.7 cells. (I) Effect of RGLS on the expression of *Pla2g7* mRNA in Raw264.7 cells. (J) Effect of RGLS on the expression of CD47 in tumor tissue. Western blots are representative of 3 independent replicates, and the images were cropped. Uncropped western blot images are attached in Supplemental Fig. 4C **P*˂0.05, ***P*˂0.01, ****P*˂0.001 compared with Con or Model group, *n* = 3.

**Figure S4.** Uncropped western blot images were obtained via Invitrogen iBright CL1500 Chemiluminescence imager. (A) Western blot for Bax, Bcl-xL, Pro-casp3, and β-Actin in S-180 cells. (B) Western blot for Pla2g7 and β-Actin in S-180 cells (4J) or Raw264.7 cells (4K). (C) Western blot for LC3B, p62, and β-Actin in S-180 cells.

**Table legends**

**Table S1.** Antibodies information in western blotting

| Antibody | Source | Cat | Concentration |
| --- | --- | --- | --- |
| Bax | Diagbio Biotechnology Co., Ltd | db819 | 1:1000 |
| Bcl-xL | db225 | 1:1000 |
| LC3B | db760 | 1:1000 |
| p62 | db22928 | 1:1000 |
| β-Actin | db7283 | 1:1000 |
| HRP-conjugated goat anti-rabbit IgG (H+L) | db10002 | 1:2000 |
| Pla2g7 | Proteintech | 15526-1-AP | 1:1000 |
| Casp3 | Cell Signaling Technology | 9662 | 1:1000 |

**Table S2.** Primer sequences for qRT-PCR

| Gene | F | R |
| --- | --- | --- |
| *Pla2g7* | CGGAGCCTTCAGGACGATTT | TCTCTGTGTTCGACAGTGGC |
| *GAPDH* | GCGCCCTTGGCTAAGGTTAT | AGGCCATACCAGTCAGCTTG |
